# Supplementary material
Source: Research Square preprint supplement (doi:10.21203/rs.3.rs-9759529/v1)
Supplement: Supplementary file 1 [file 75799259e2fb37ff8f15d4f0.docx]

# Supplementary material

Table S1: Overview of organisms present in the studied seaweed cultivation site. Depending on which sampling method, organisms were divided into two columns. In the line samples, all sizes were counted; in the mobile samples, only the organisms bigger than 1 cm were considered and counted.

| ***Taxonomic level*** | ***Name*** | ***Line samples  (mostly sessile)*** | ***Mobile samples (mostly mobile)*** |
| --- | --- | --- | --- |
| *Species* | *Aequipecten opercularis* | *Present, quantified* | *Not considered* |
| *Species* | *Hyas coarctatus* | *Present, quantified* | *Present, quantified* |
| *Species* | *Caprella mutica* | *Present, quantified* | *Present, quantified* |
| *Species* | *Tectura virginea* | *Present, quantified* | *Not considered* |
| *Species* | *Idotea balthica* | *absent* | *Present, quantified* |
| *Species* | *Lacuna vincta* | *Present, quantified* | *Not considered* |
| *Species* | *Galathea nexa* | *Present, quantified* | *Present, quantified* |
| *Species* | *Hippolyte varians* | *absent* | *Present, quantified* |
| *Species* | *Ascidiella scabra* | *Present, quantified* | *Not considered* |
| *Species* | *Dendronotus frondosus* | *Present, quantified* | *Present, quantified* |
| *Genus* | *Mytilus sp.* | *Present, quantified* | *Not considered* |
| *Genus* | *Hiatella sp.* | *Present, quantified* | *Not considered* |
| *Genus* | *Ascidiella sp.* | *Present, quantified* | *Not considered* |
| *Genus* | *Balanus sp.* | *Present, quantified* | *Not considered* |
| *Genus* | *Idotea sp.* | *absent* | *Present, quantified* |
| *Family* | *Anomiidae* | *Present, quantified* | *Not considered* |
| *Order* | *Amphipoda* | *Present, quantified* | *Not considered* |
| *Class* | *Echinoidea* | *absent* | *Present, quantified* |
| *Class* | *Polychaeta* | *Present, quantified* | *Present, quantified* |
| *Class* | *Actinopterygii* | *absent* | *Present, quantified* |
| *Class* | *Hydrozoa* | *Present, not quantified* | *Absent* |
| *Phylum* | *Bryozoas* | *Present, not quantified* | *Absent* |
| *Phylum* | *Porifera* | *Present, not quantified* | *Absent* |
| *N.A.* | *Ichthyoplankton* | *absent* | *Present, not quantified* |


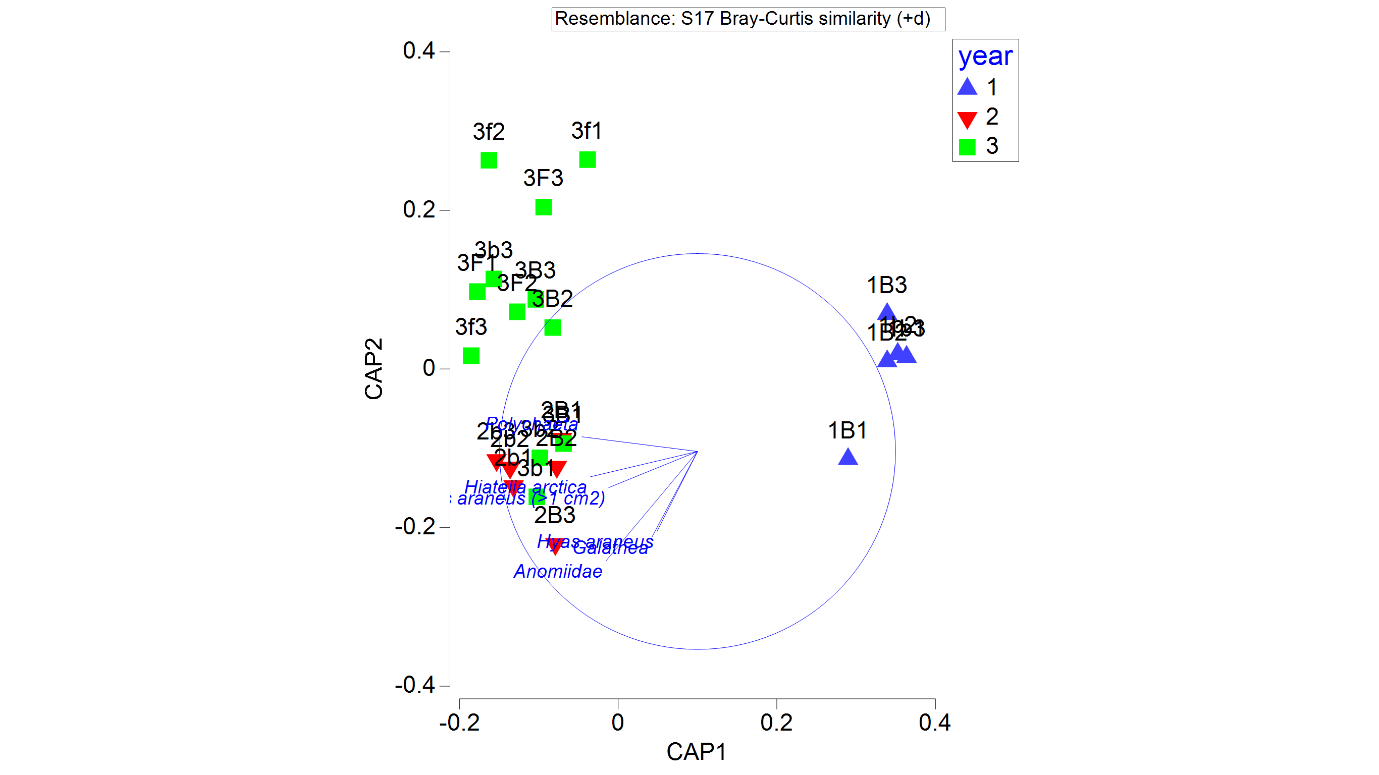


Figure S1: Cap graph of factor ‘year’ displaying loading vectors to organisms with R >= 0.45. Data does not include 1st year line April samples. PERMANOVA tests with Monte Carlo simulations based on D2 average distances for each organism until reaching a statistical significance threshold of p=0.05 were performed to identify which organisms contribute most to differences between samples.

Table S2: Organism richness of averages of replicates.

| **Sites** | **Exposed** | | | | **Semi-exposed** | **Both sites** | |
| --- | --- | --- | --- | --- | --- | --- | --- |
| **Month** | **All years** | **1** | **2** | **3** | **3** | **3** | **All years** |
| **April** | 1.12 | 0 | 1.16 | 1.08 | 1.252 | 1.166 | 1.164 |
| **July** | 1.195 | 0.89 | 1.496 | 1.199 | 1.663 | 1.431 | 1.312 |
| **Both seasons** | 1.165 | 0.89 | 1.328 | 1.1397 | 1.4575 | 1.2986 | 1.249 |
